# Supplementary material for: Multifunctional Supramolecular Hybrid Materials Constructed from Hierarchical Self-Ordering of In Situ Generated Metal-Organic Framework (MOF) Nanoparticles
Source: PubMed Central journal article supplement (PMC4584506; doi:10.1002/adma.201501448), 2015-06-25
Supplement: adma0027-4438-sd1.pdf [file adma0027-4438-sd1.pdf]

# ADVANCED MATERIALS

## Supporting Information

for *Adv. Mater.*, DOI: 10.1002/adma.201501448

Multifunctional Supramolecular Hybrid Materials Constructed  
from Hierarchical Self-Ordering of In Situ Generated Metal-  
Organic Framework (MOF) Nanoparticles

*Abhijeet K. Chaudhari, Intaek Han, and Jin-Chong Tan\**

Copyright WILEY-VCH Verlag GmbH & Co. KGaA, 69469 Weinheim, Germany, 2013.

## *Supporting Information*

# **Multifunctional supramolecular hybrid materials constructed from hierarchical self-ordering of *in situ* generated metal-organic framework (MOF) nanoparticles**

*Abhijeet K. Chaudhari,<sup>1</sup> Intaek Han<sup>2</sup> and Jin-Chong Tan<sup>\*1</sup>*

<sup>1</sup>*Department of Engineering Science, University of Oxford, Parks Road, Oxford OX1 3PJ, United Kingdom*

<sup>2</sup>*Materials Research Center, Samsung Advanced Institute of Technology (SAIT), Samsung Electronics, Suwon 443-803, Republic of Korea*

*\*E-mail: jin-chong.tan@eng.ox.ac.uk*

### *Table of Contents*

|                                                                                               |    |
|-----------------------------------------------------------------------------------------------|----|
| Scheme: Supramolecular MOF hybrids .....                                                      | 2  |
| Table S1: Base-dependent gelation in different solvents .....                                 | 4  |
| Table S2: Sol-gel transformation <i>via</i> chemical stimuli in G $\supset$ DMSO system ..... | 5  |
| Scanning electron microscopy (SEM) images .....                                               | 6  |
| Hydrogen bonding and $\pi$ - $\pi$ interactions.....                                          | 12 |
| Powder X-ray Diffraction (PXRD) .....                                                         | 15 |
| Atomic force microscopy (AFM) of HKUST-1 nanoparticles .....                                  | 16 |
| Investigating the fibre formation mechanisms .....                                            | 17 |
| Rheological studies .....                                                                     | 20 |
| Electrical conductivity measurements.....                                                     | 27 |
| MOF thin films fabricated from sol-gel method .....                                           | 28 |
| References .....                                                                              | 30 |

## Scheme: Supramolecular MOF hybrids

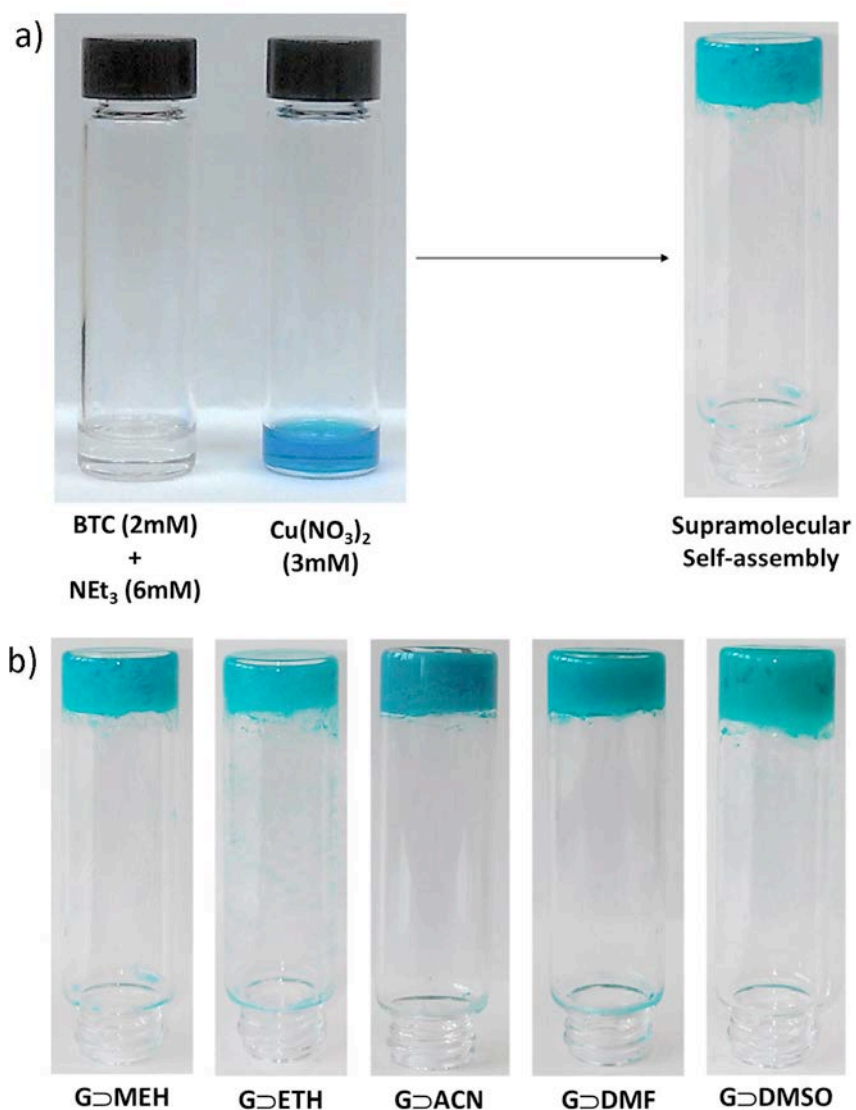

**Figure S1.** a) Scheme showing synthesis of the MOF-based supramolecular hybrid self-assembly, b) gel (G) samples synthesized by using different solvents (MEH: methanol, ETH: ethanol, ACN: acetonitrile, DMF: N,N-dimethylformamide, DMSO: dimethyl sulfoxide)

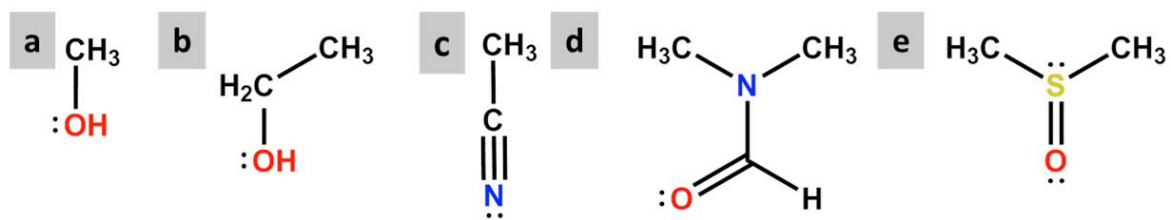

**Figure S2.** Solvent molecules used for fabricating supramolecular MOF hybrids:  
(a) methanol (b) ethanol (c) acetonitrile (d) N, N-Dimethylformamide (e) dimethyl sulfoxide.



**Table S1: Base-dependent gelation in different solvents**

| Solvent ↓                   | Base → | <sup>†</sup> NEt <sub>3</sub> | NaOH        | KOH         |
|-----------------------------|--------|-------------------------------|-------------|-------------|
| Methanol (MEH)              |        | Gel (2 min)                   | Precipitate | Precipitate |
| Ethanol (ETH)               |        | Gel (5 min)                   | Precipitate | Precipitate |
| Acetonitrile (ACN)          |        | Gel (5 min)                   | Precipitate | Precipitate |
| N,N-Dimethylformamide (DMF) |        | Gel (10 min)                  | Precipitate | Precipitate |
| Dimethylsulfoxide (DMSO)    |        | Sol-Gel (20 min)              | Precipitate | Precipitate |

<sup>†</sup>Gelation time quoted in brackets

Table above shows that MOF gelation was unsuccessful when using NaOH or KOH as bases, in which precipitation product was obtained instead of a gel.

**Table S2: Sol-gel transformation *via* chemical stimuli in G $\supset$ DMSO system**

| <b>Sol-Gel Cycle #</b> | <b>Addition</b>                   | <b>Concentration</b> | <b>Time taken for gelation</b> |
|------------------------|-----------------------------------|----------------------|--------------------------------|
| 1                      | Cu(NO <sub>3</sub> ) <sub>2</sub> | 0.5 mM               | (Sol)                          |
|                        | BTC <sup>3-</sup>                 | 1.5 mM               | (Gel) ~15 min                  |
| 2                      | BTC <sup>3-</sup>                 | 1.5 mM               | (Sol)                          |
|                        | Cu(NO <sub>3</sub> ) <sub>2</sub> | 0.5 mM               | (Gel) ~60 min                  |
| 3                      | Cu(NO <sub>3</sub> ) <sub>2</sub> | 0.5 mM               | (Sol)                          |
|                        | BTC <sup>3-</sup>                 | 1.5 mM               | (Gel) ~150 min                 |

Table above shows 3 repeated cycles demonstrating sol-gel chemico-response triggered by sequential of Cu(II) or BTC<sup>3-</sup>. It was found that each subsequent cycle takes approximately twice as long the time needed, compared to the former cycle, to reach complete gelation.

Scanning electron microscopy (SEM) images

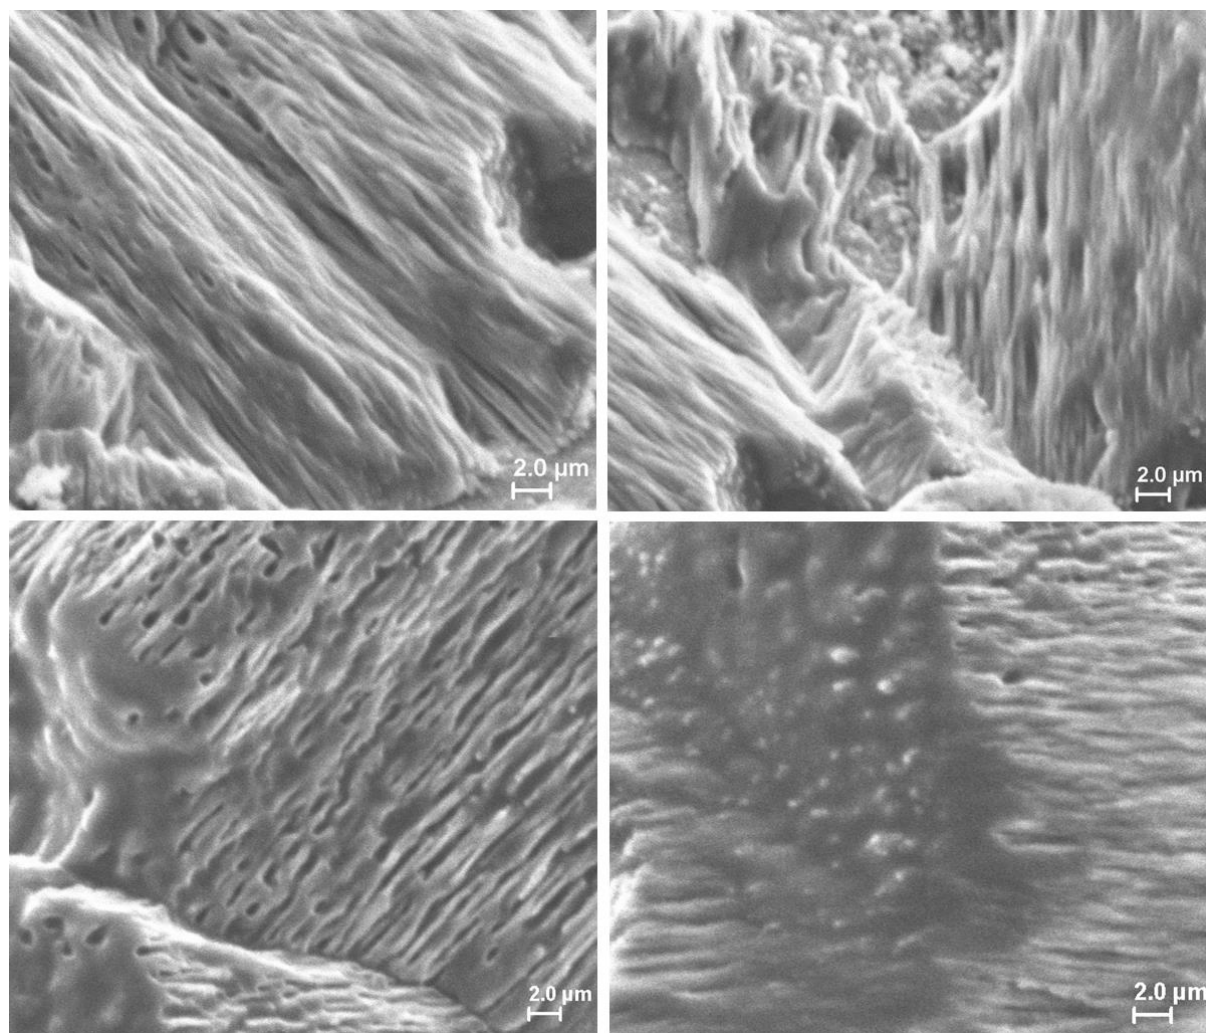

**Figure S3.** SEM images of visco-elastic solid (VE-ACN) obtained from G-ACN assembly, revealing microstructures comprising lamellar fibrous filaments incorporating HKUST-1 nanoparticles.

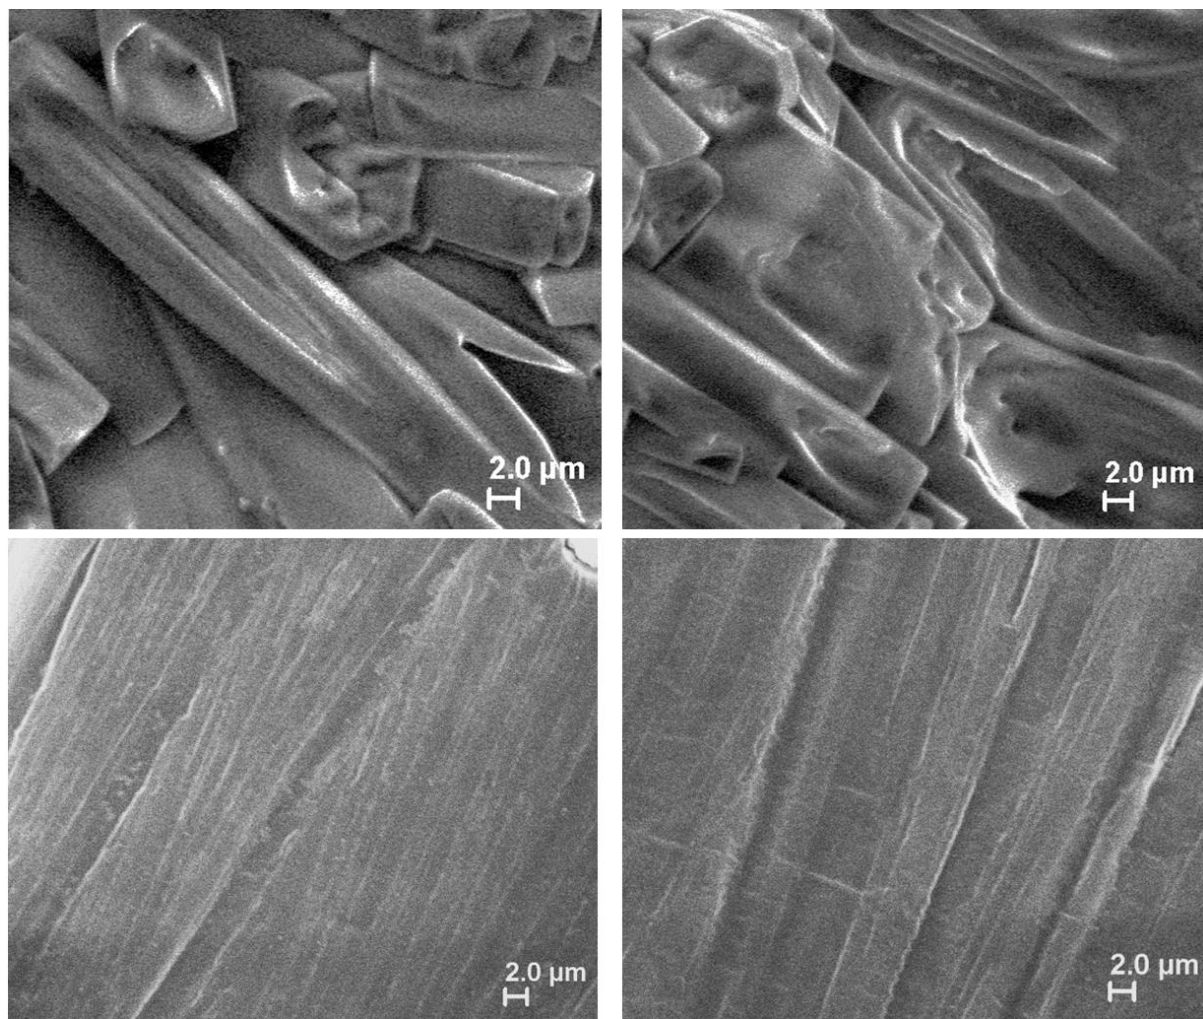

**Figure S4.** SEM images of dried sample of **GMEH** with lamellar nano-crystalline particle microstructure within the fibrous network.

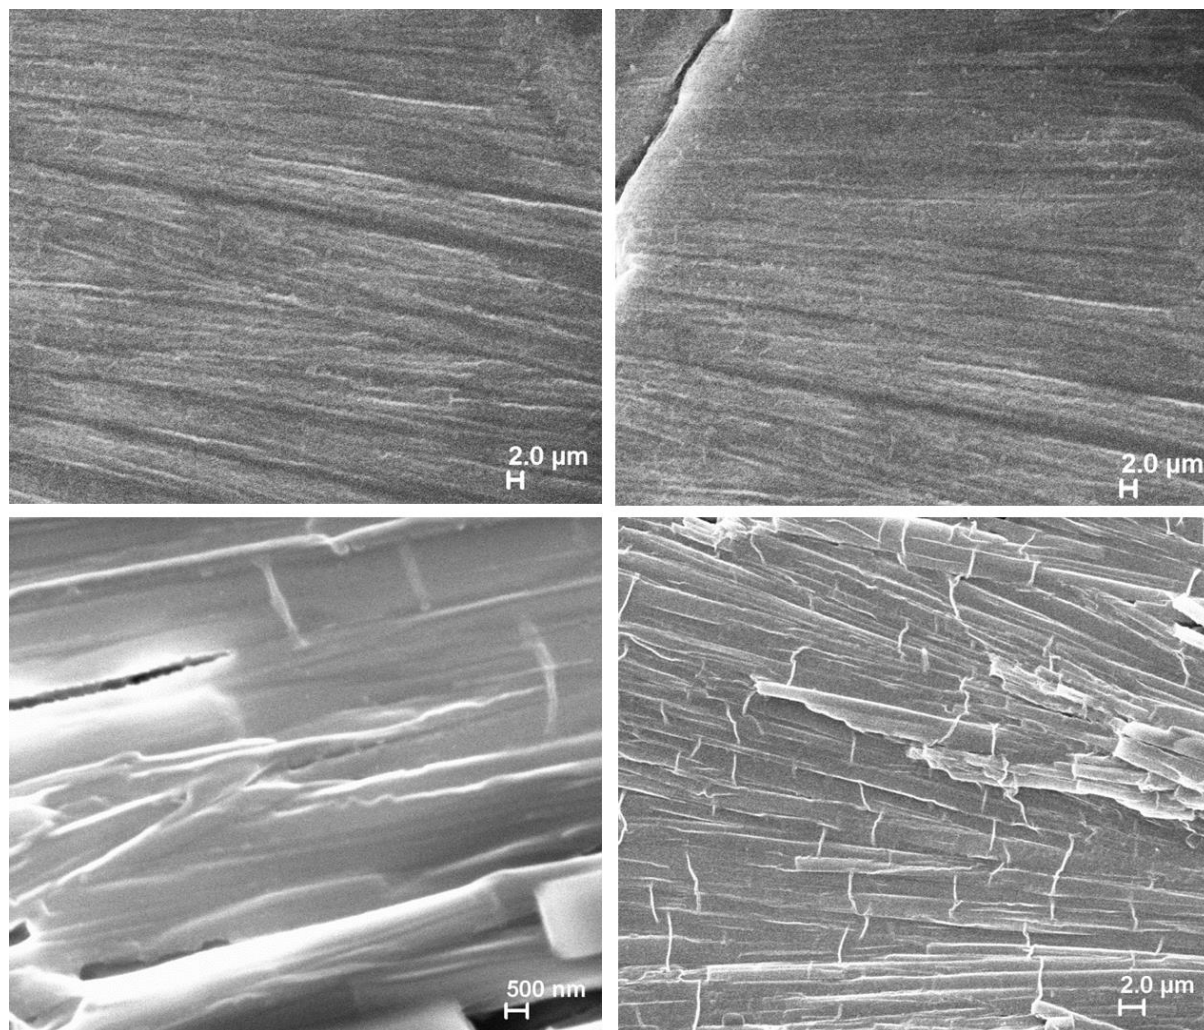

**Figure S5.** Additional SEM images of dried samples of **GOMEH** showing developments of transverse cracking across fibres upon drying of the gel hybrid material.

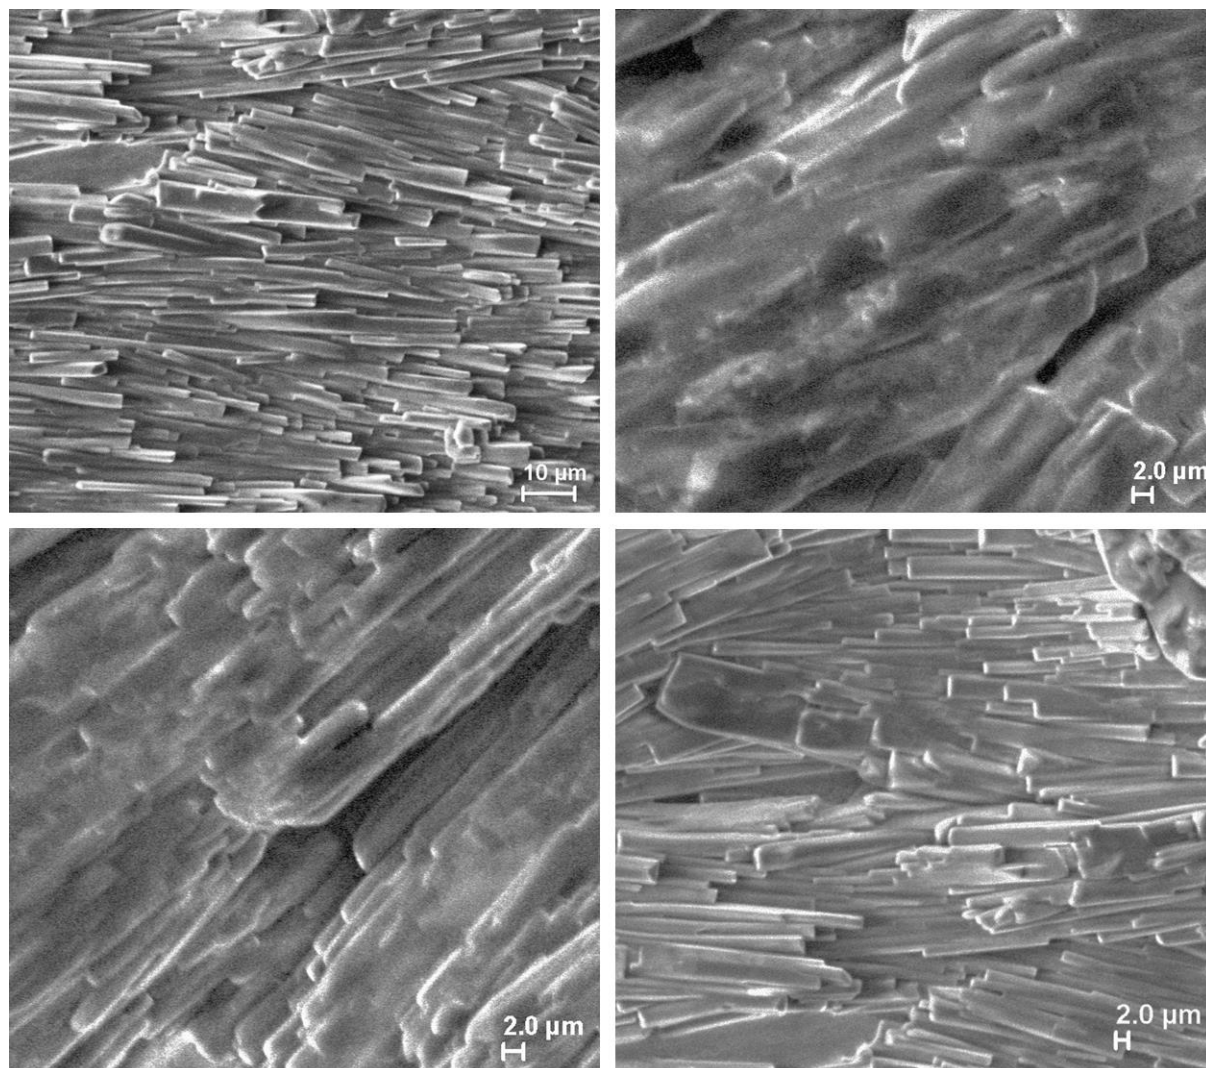

**Figure S6.** SEM images of dried sample of **G-DMF**. Top right and bottom left images show nano-crystalline particle microstructure visible in the fibrous network.



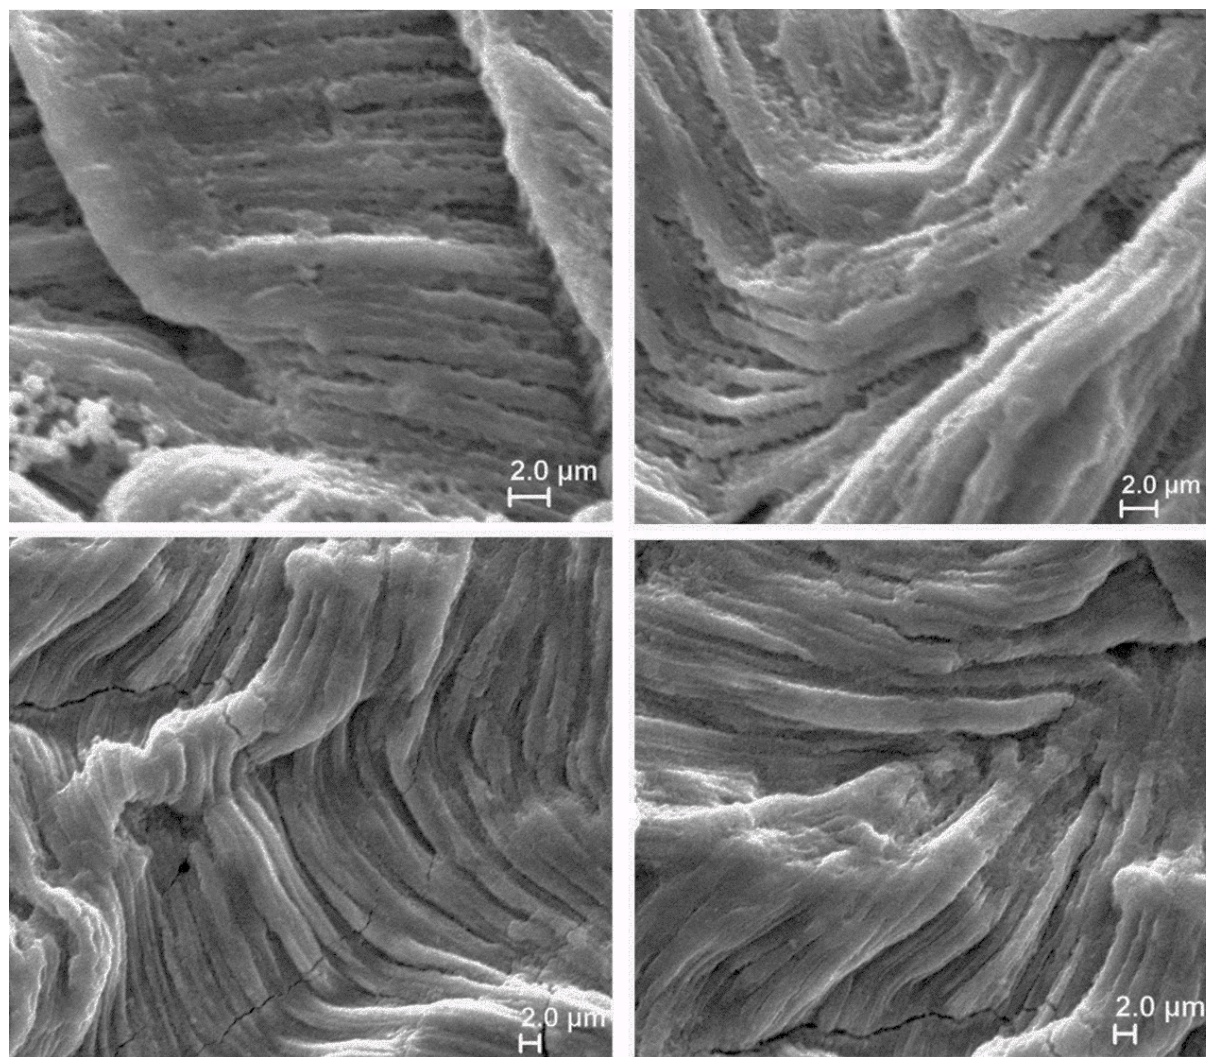

**Figure S7.** SEM images of dried sample of **G $\Rightarrow$ ETH** showing bundles of micron-size fibers, each of which containing HKUST-1 nanoparticles. Note that the transverse cracks developed upon drying of the gel hybrid.

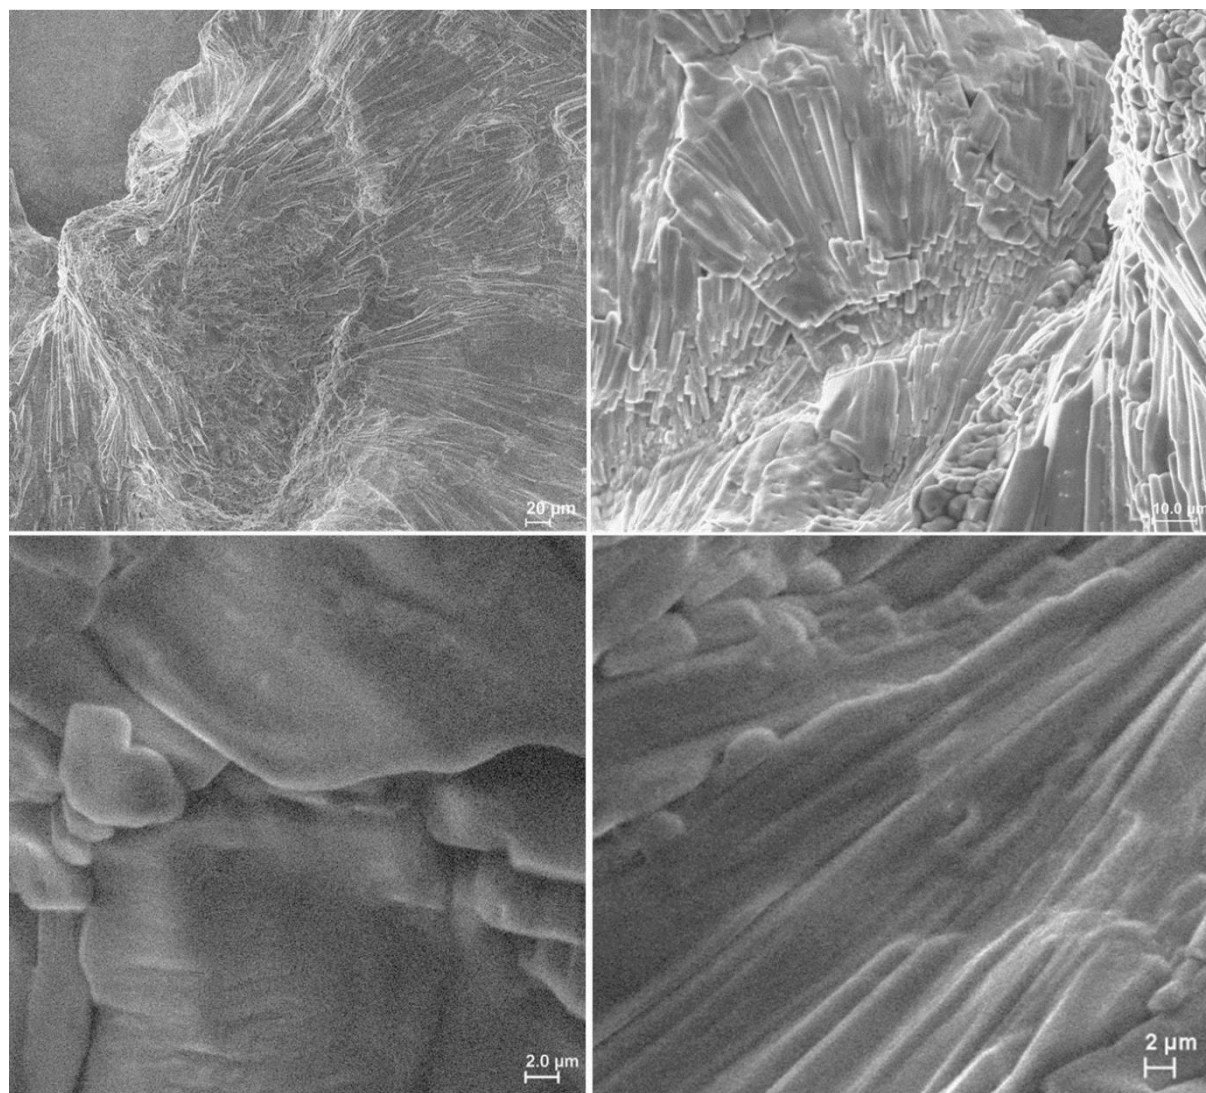

**Figure S8.** SEM images of dried sample of bulk GETH revealing bundles of fiber morphology formed by self-assembly.



### Hydrogen bonding and $\pi$ - $\pi$ interactions

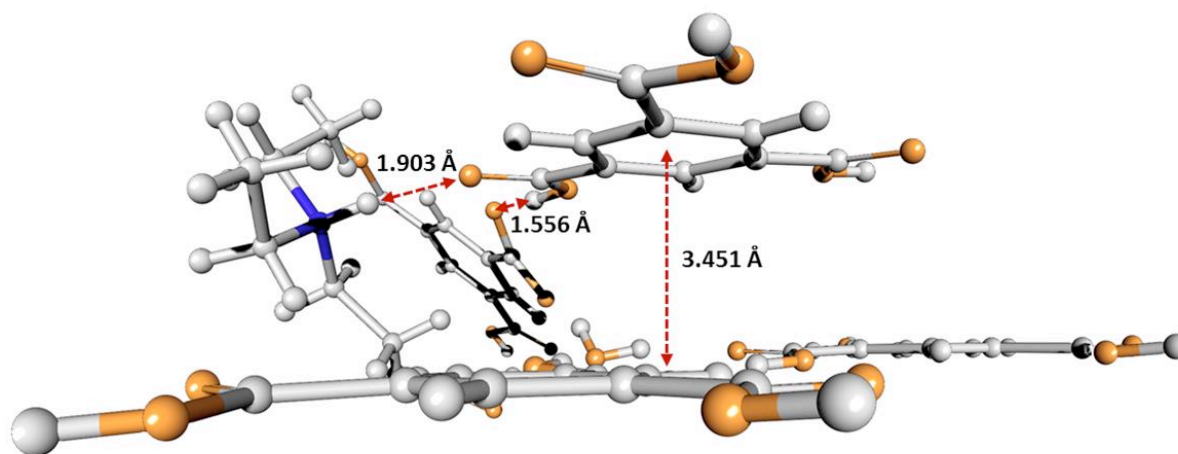

**Figure S9.** Strong  $\pi$ - $\pi$  interactions and hydrogen bonding interactions present between the BTC<sup>3-</sup> and NEt<sub>3</sub> molecules.<sup>2</sup> Color scheme adopted - Blue: nitrogen; Brown: oxygen, Grey: carbon.

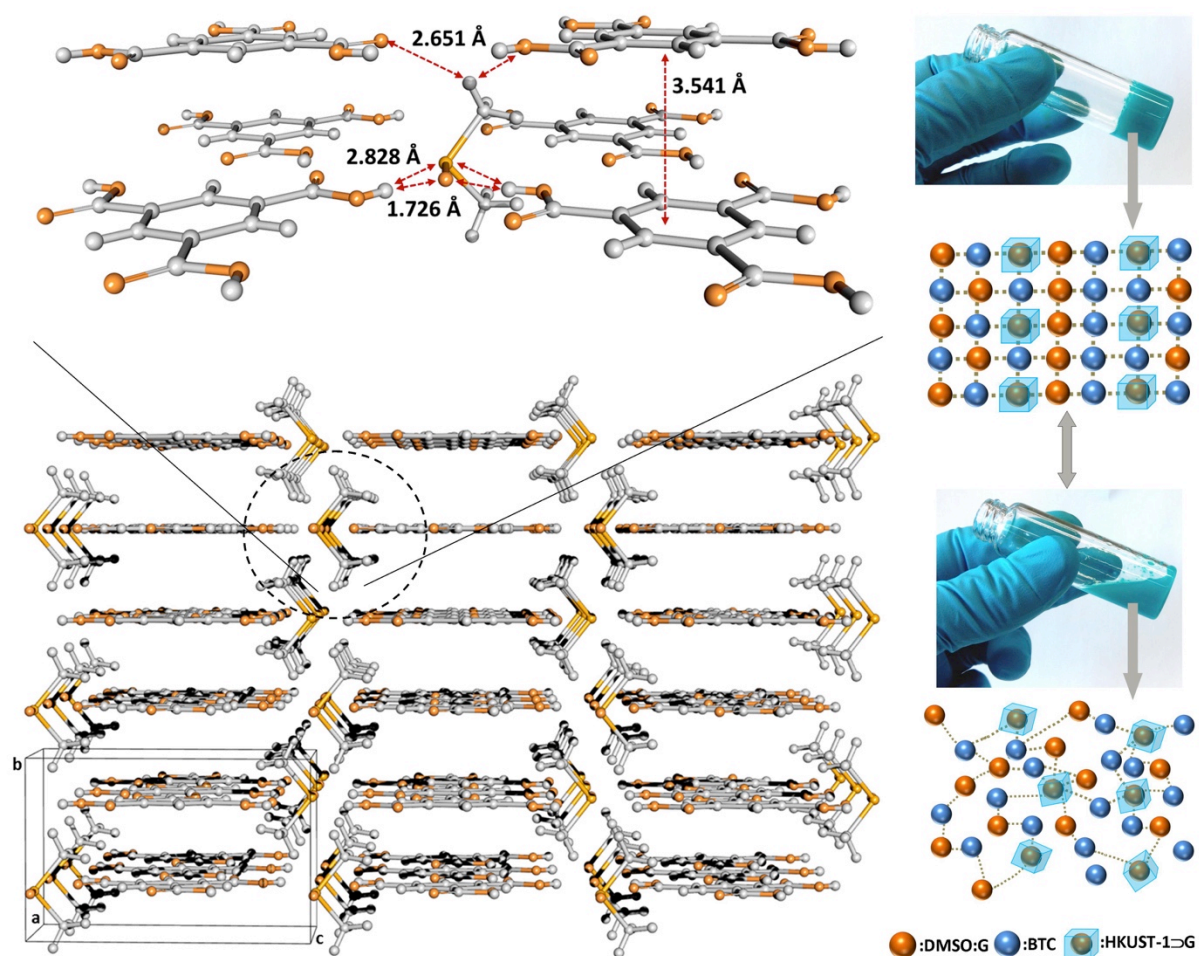

**Figure S10.** Packing diagram of co-crystals of BTC<sup>3-</sup> and DMSO molecules showing very strong interactions of S and O atoms with surrounding and aligned layers of BTC<sup>3-</sup> by means of  $\pi$ - $\pi$  and hydrogen bonding interactions.<sup>3</sup> Right panel illustrates the proposed reversible sol-gel conversion evidenced in G  $\rightleftharpoons$  DMSO. Color scheme - Brown: oxygen; Yellow: sulphur; Grey: carbon.

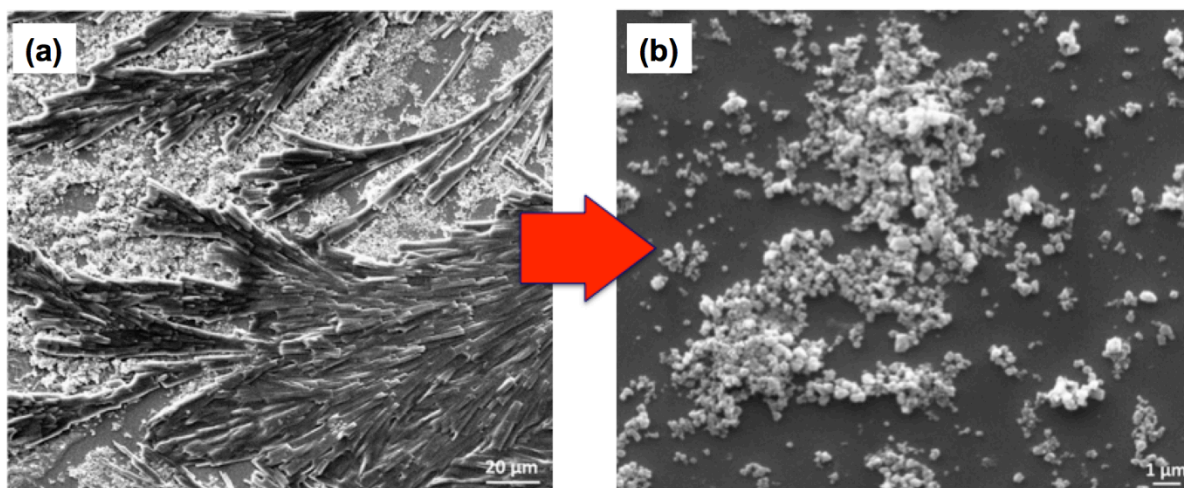

**Figure S11.** (a) Drying of gel fibrous assembly at room temperature transforms gels into globular nano size particles of HKUST-1. (b) Subsequent immersion into a polar solvent (e.g. MeOH) for less than 1 min causes further breakdown of fibrils to yield pure HKUST-1 nanocrystals (see Suppl. Fig. S13) as final stable product.

## Powder X-ray Diffraction (PXRD)

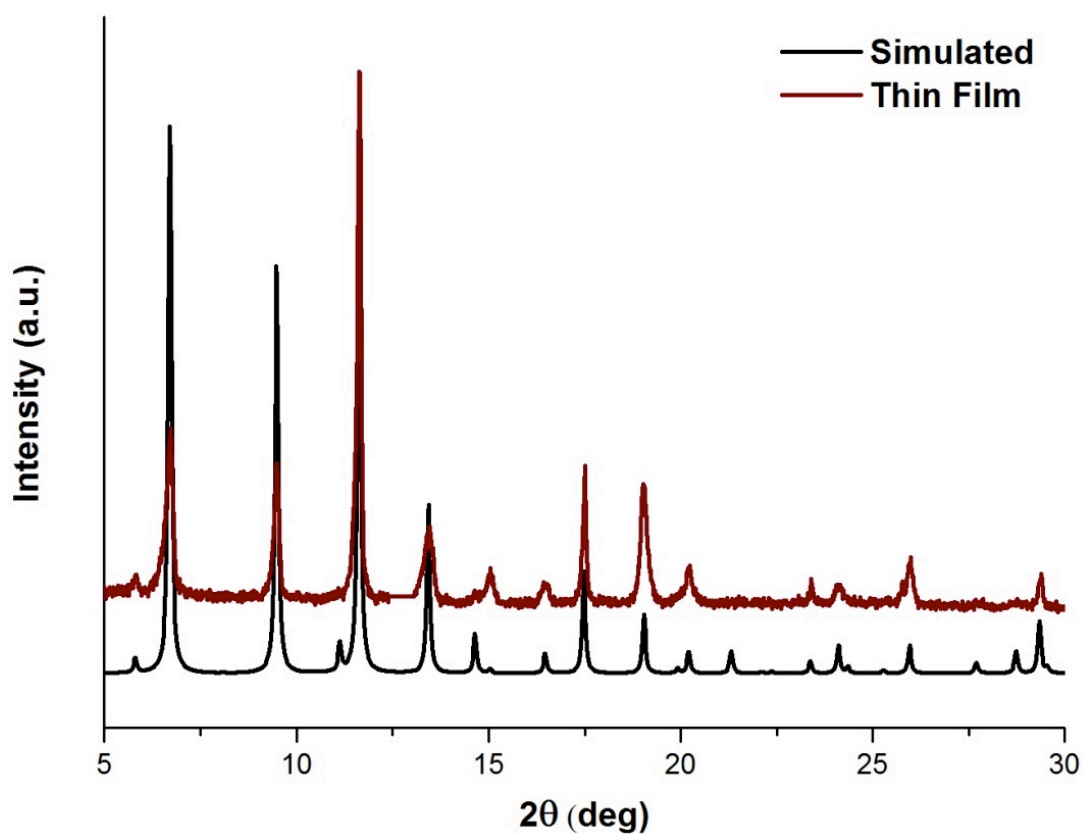

**Figure S12.** Powder X-ray diffraction patterns for the simulated HKUST-1 (black) and that obtained from the thin film of HKUST-1 (wine) fabricated *via* sol-gel method.

Atomic force microscopy (AFM) of HKUST-1 nanoparticles

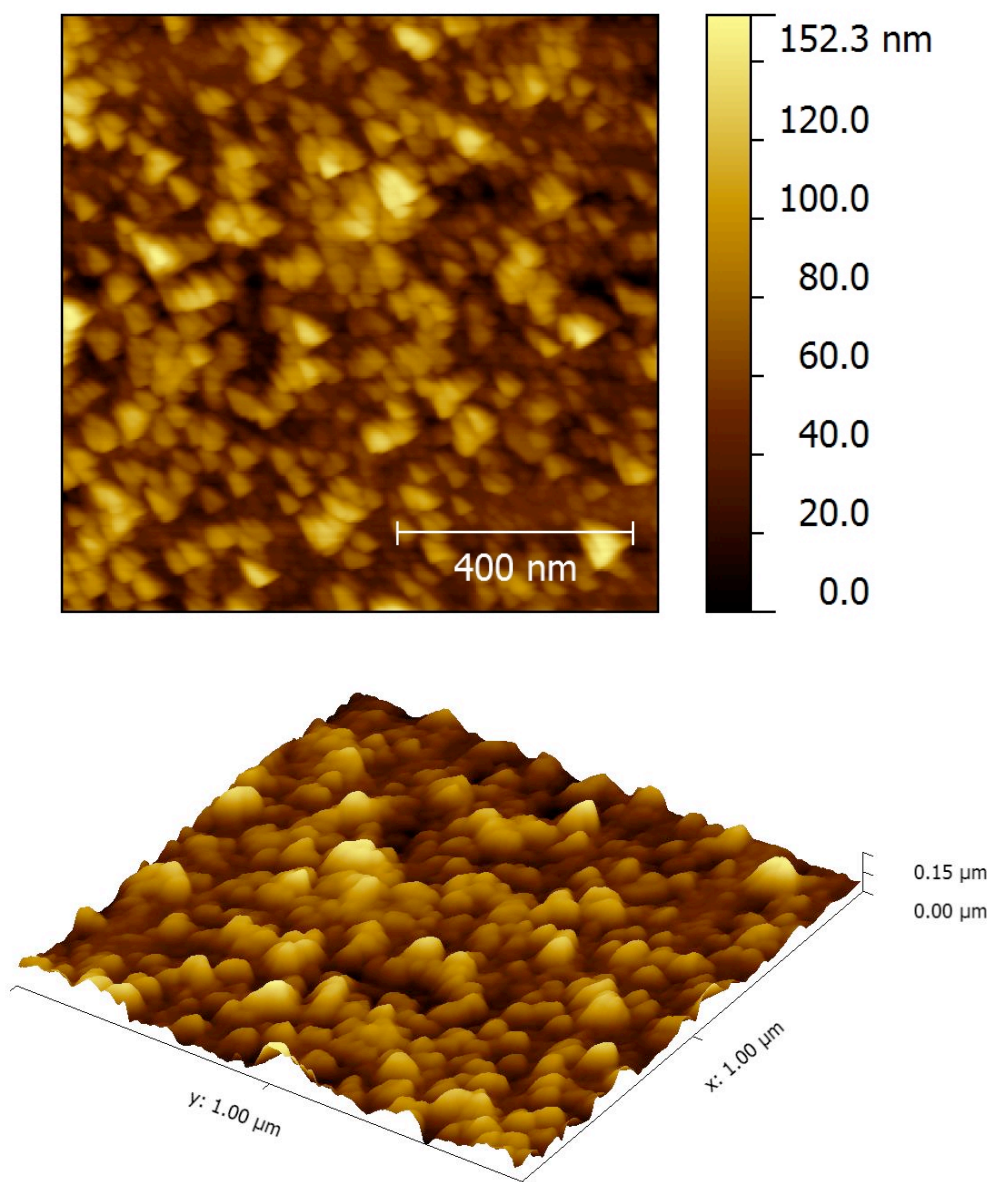

**Figure S13.** Atomic force microscopy (AFM) imaging of HKUST-1 nanoparticles harvested from the gel-like hybrid materials (top: 2D topography, bottom: 3D view).

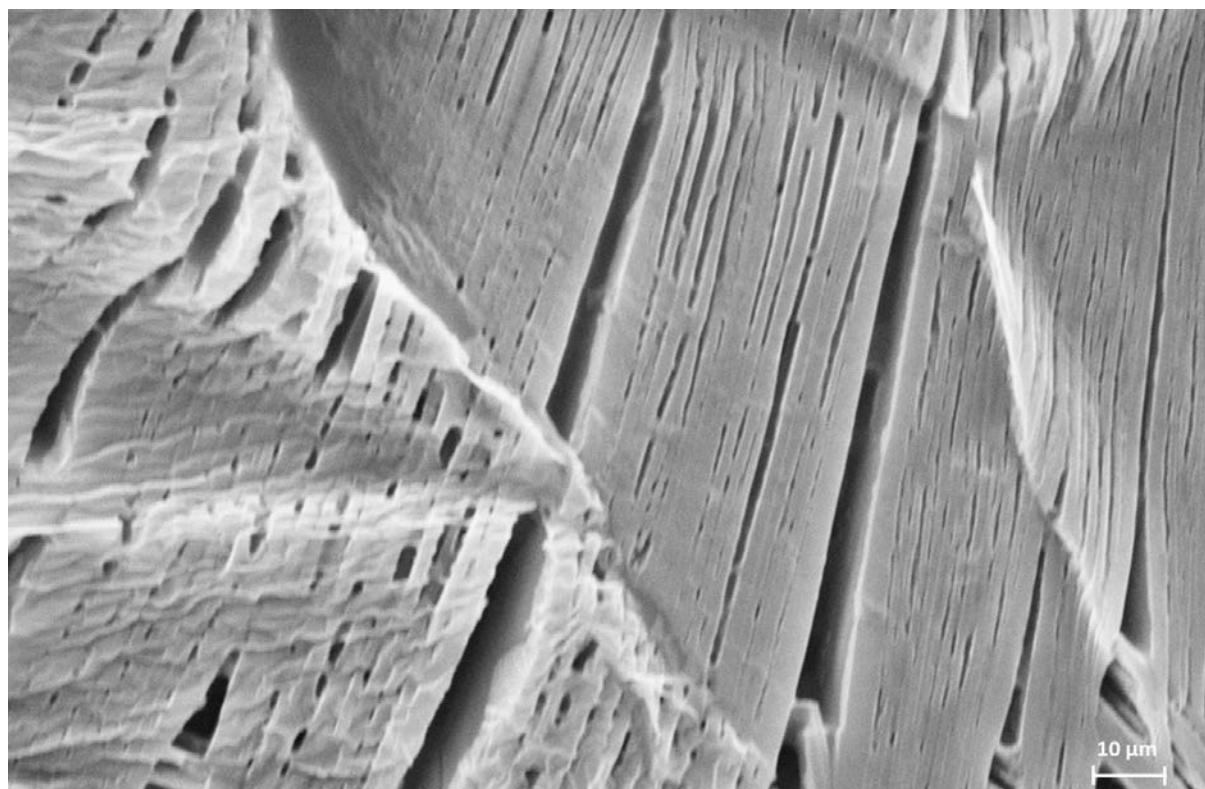

**Figure S14.** SEM image of a dried sample of **G<sub>3</sub>MEH** obtained by layering two reactants one above the other. The lamellar microstructure is prevalent.



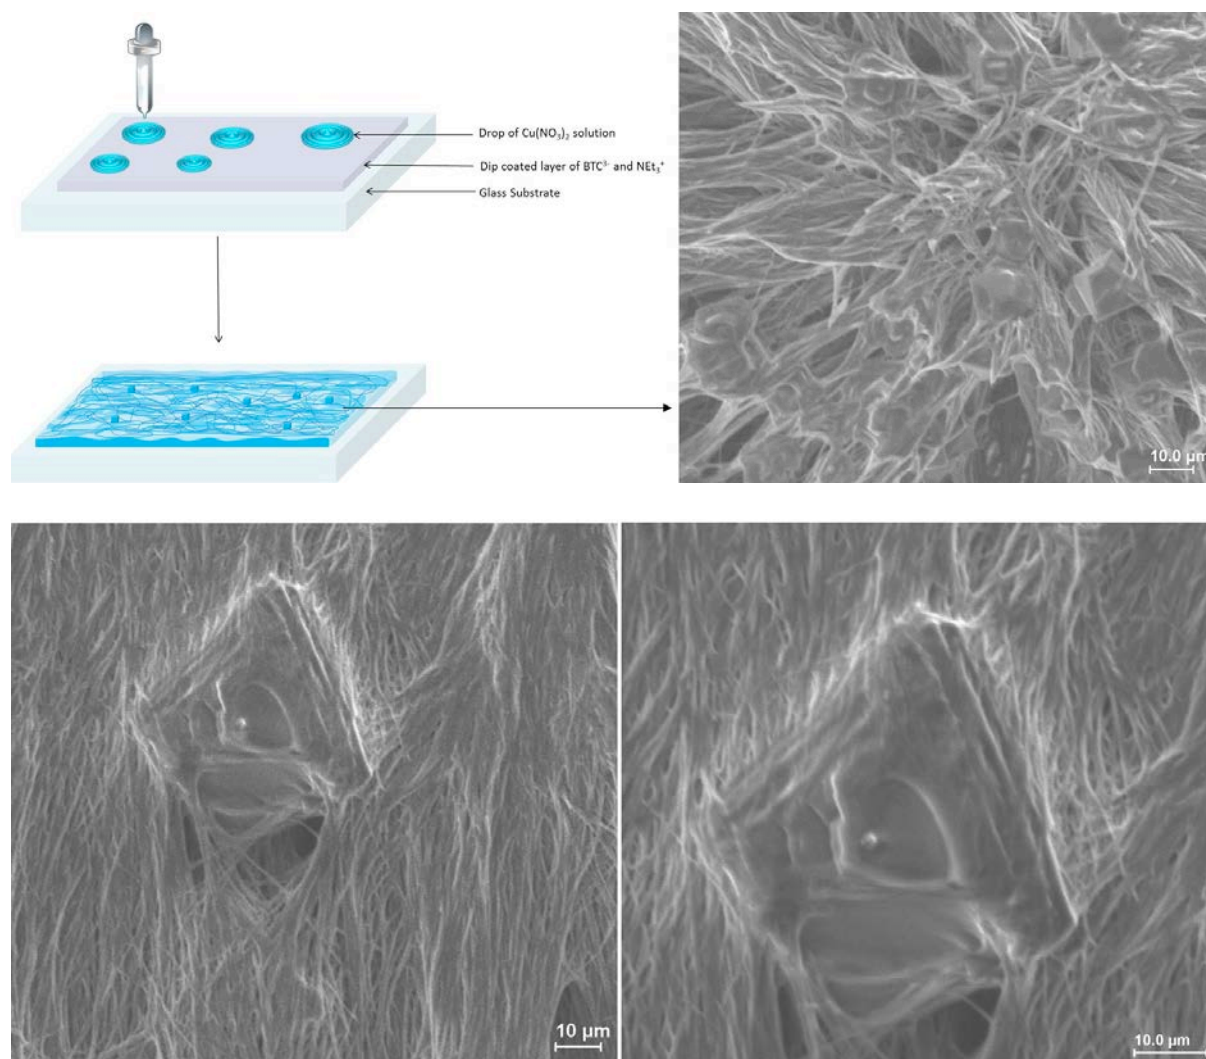

**Figure S15.** Schematic presentation showing the method adopted for uneven (non-uniform) dissemination of two reactants to understand plausible formation of hybrid gel reaction products. SEM images show that, on top of the fibrous network of **G-DMSO** are partially embedded what appears to be a ‘defective’ HKUST-1 crystal featuring surface steps akin to screw dislocations.<sup>1</sup>

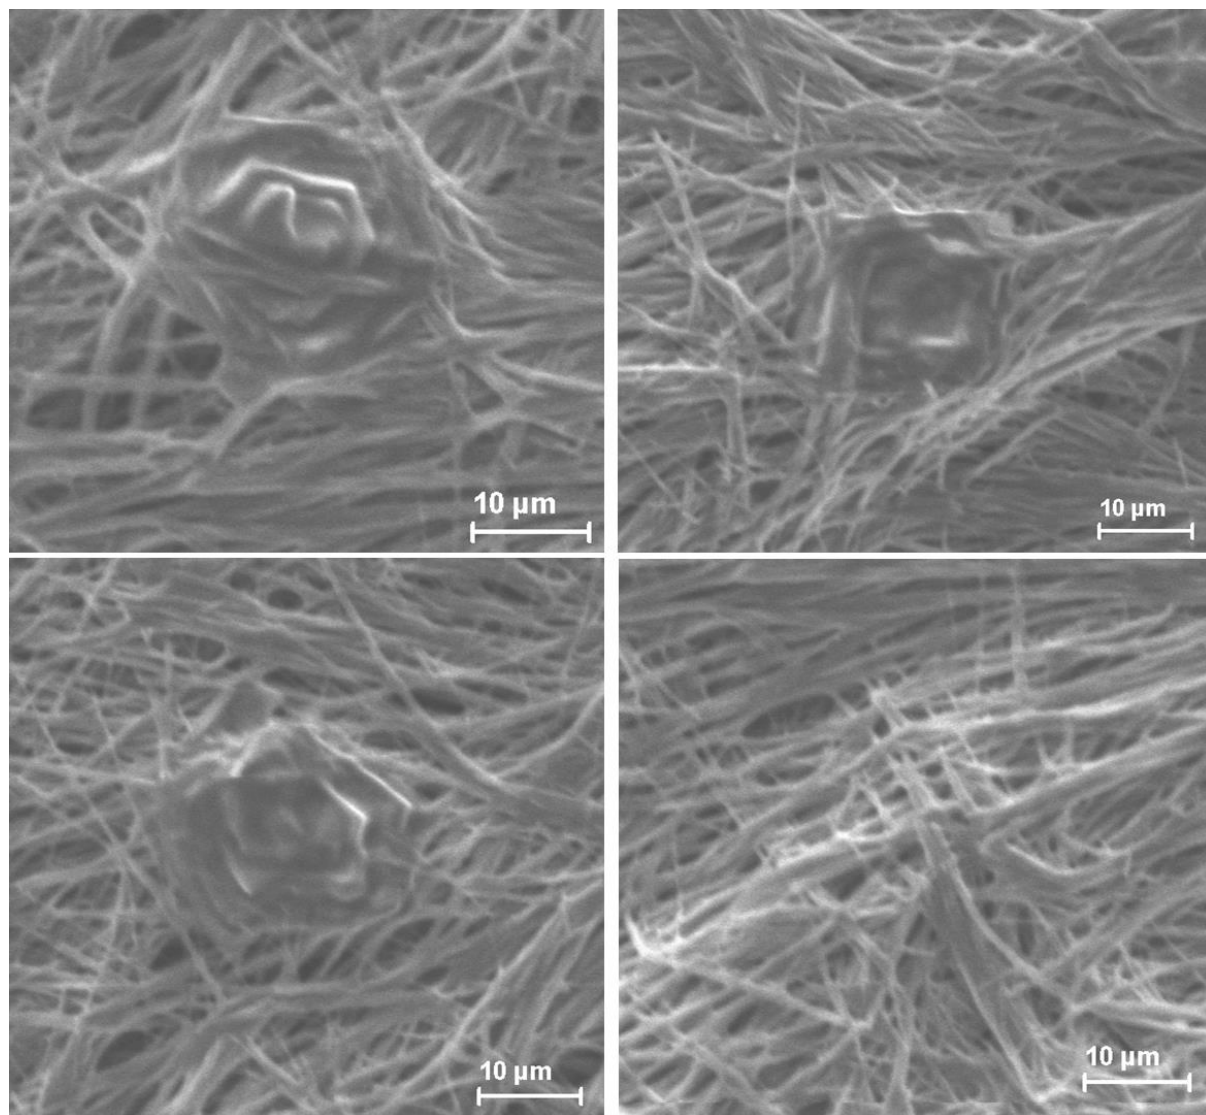

**Figure S16.** SEM images of the sample made using uneven mixing of reactants showing generation of defective HKUST-1 crystals measuring 10s of microns, from hybrid self-assembly that generates supramolecular MOF hybrid of **G**⊃**DMSO**.



## Rheological studies

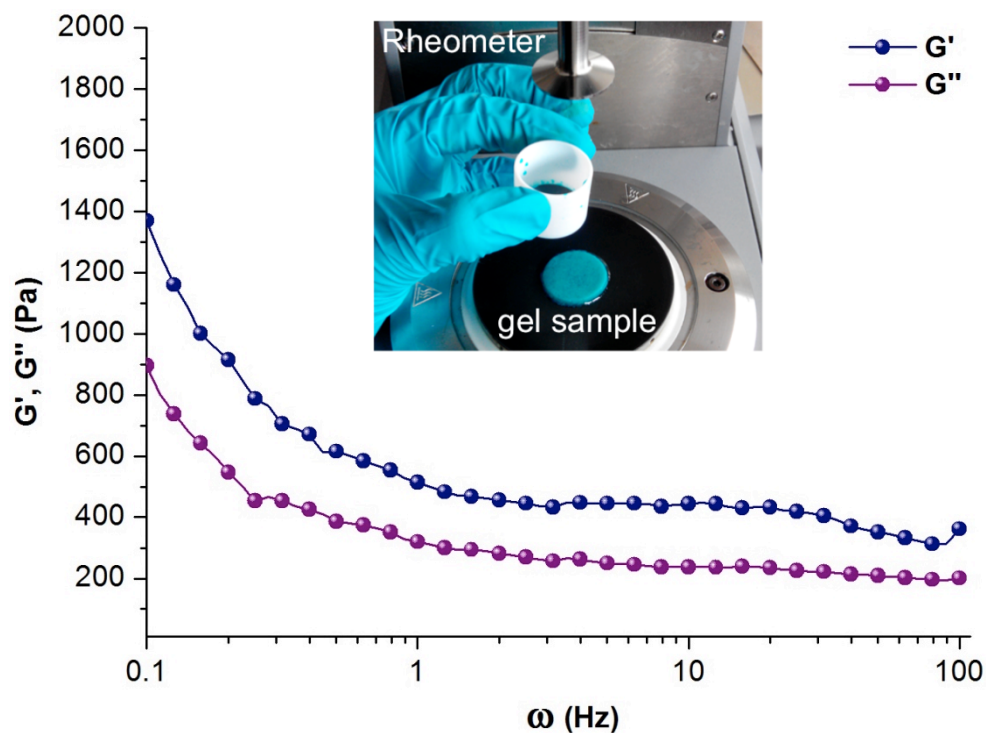

**Figure S17.** Storage modulus ( $G'$ ) and loss modulus ( $G''$ ) of  $G\supset\text{MEH}$  at constant 1% strain. Inset shows the method used for preparing hybrid gels directly on the stage of the rheometer.

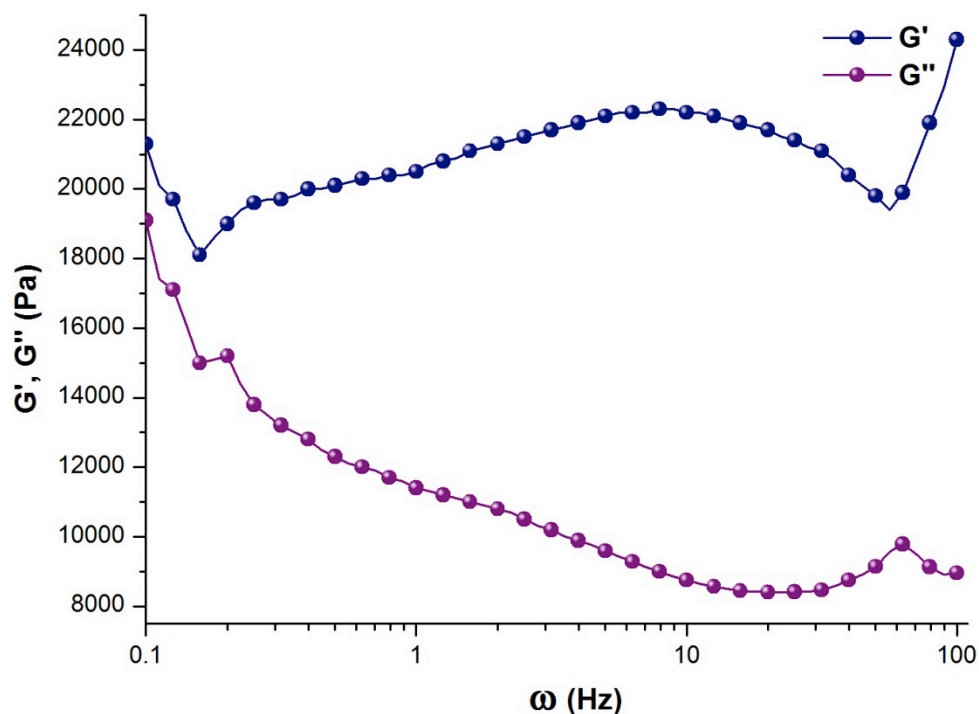

**Figure S18.** Storage modulus ( $G'$ ) and loss modulus ( $G''$ ) of  $G\supset\text{ETH}$ .

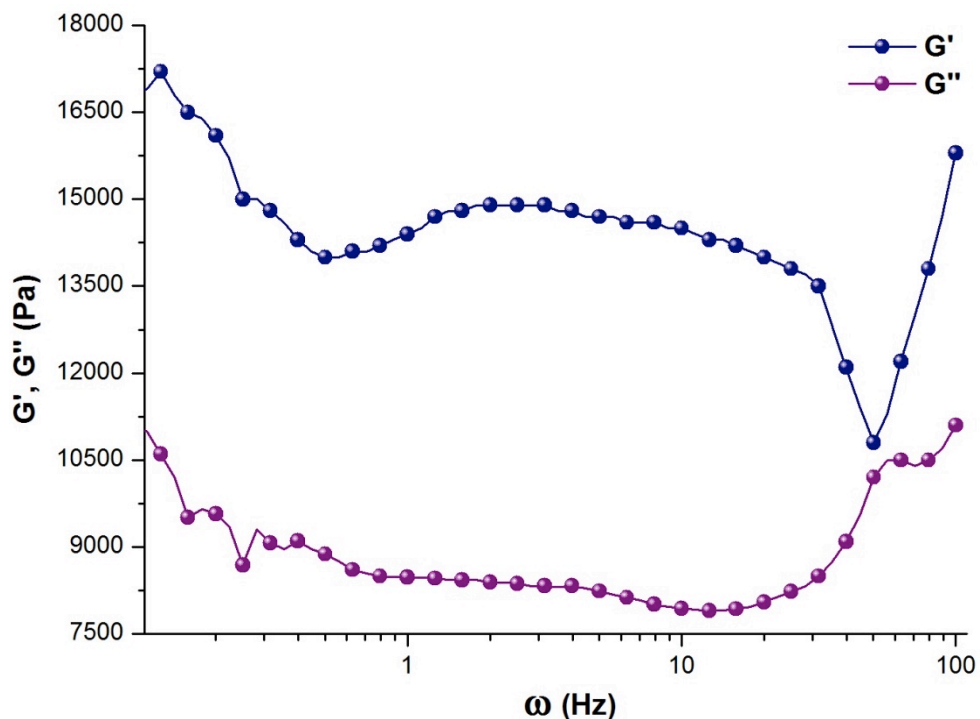

**Figure S19.** Storage modulus ( $G'$ ) and loss modulus ( $G''$ ) of  $G\supset ACN$ .

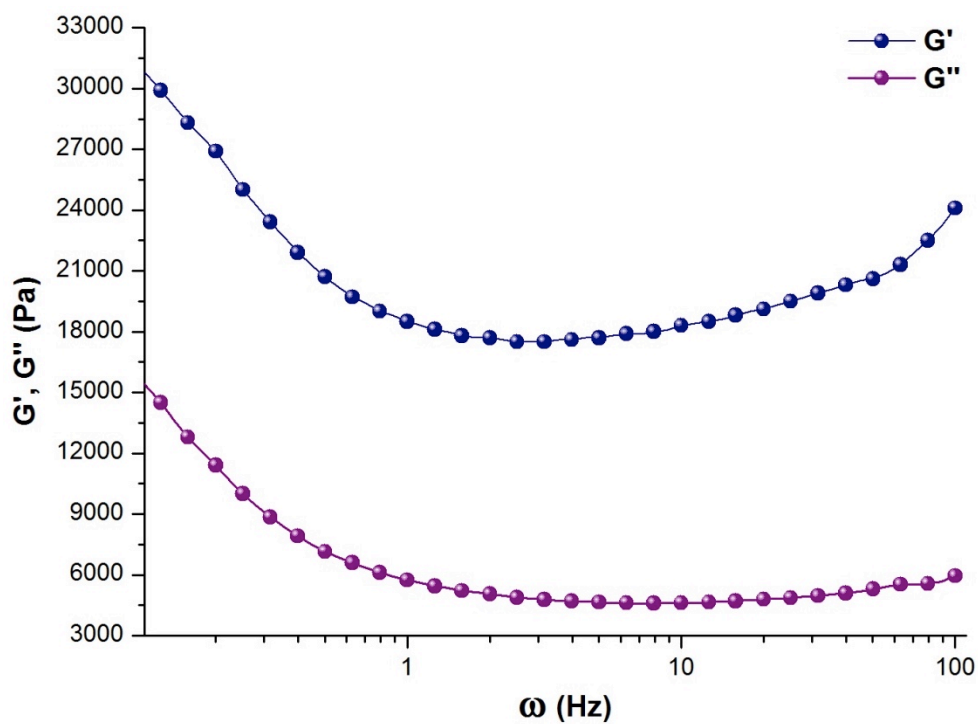

**Figure S20.** Storage modulus ( $G'$ ) and loss modulus ( $G''$ ) of  $G\supset DMF$

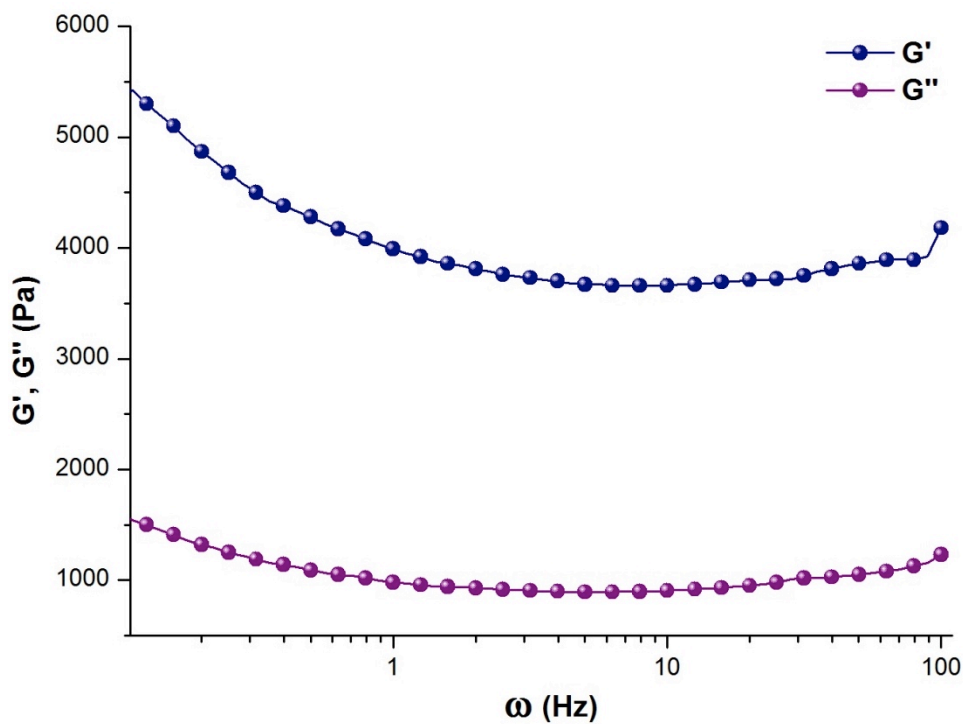

Figure S21. Storage modulus ( $G'$ ) and loss modulus ( $G''$ ) of  $G\supset DMSO$ .

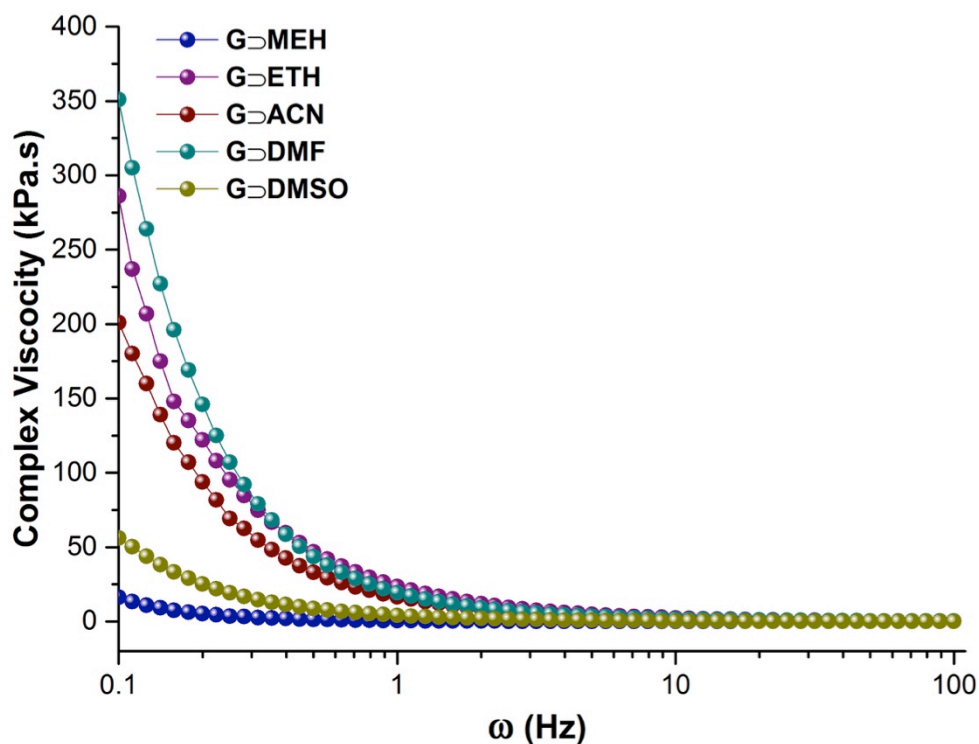

Figure S22. Viscosities of all gel samples measured against frequency, from 0.1 to 100 Hz.

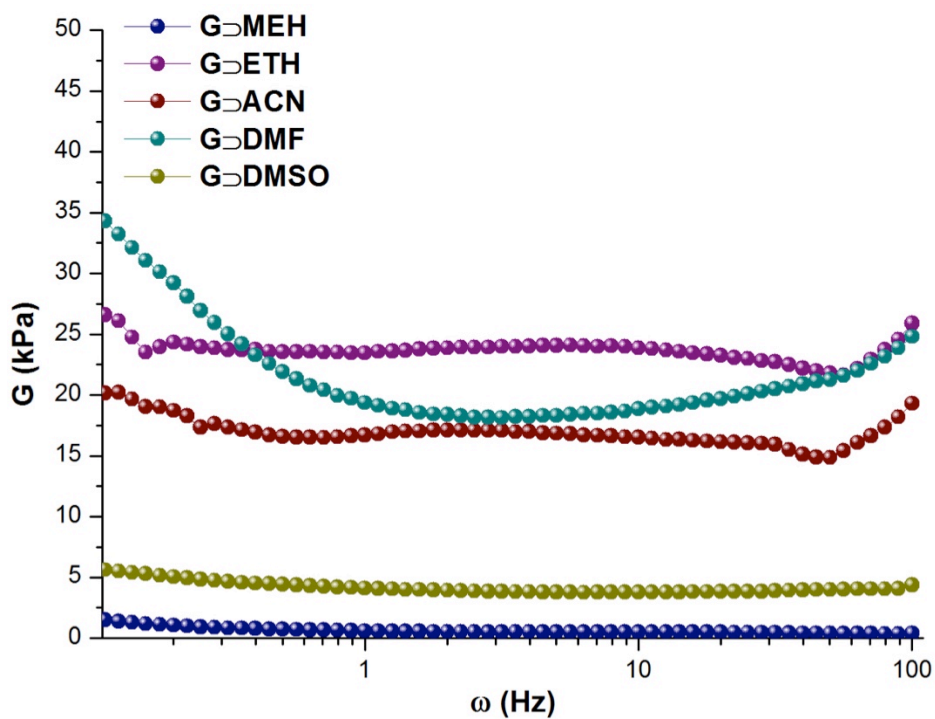

**Figure S23.** Shear modulus ( $G$ ) of all gel samples, calculated from the storage ( $G'$ ) and loss ( $G''$ ) components of the moduli, where  $|G| = \sqrt{(G')^2 + (G'')^2}$ .

Thixotropic behavior of G $\supset$ DMSO hybrid material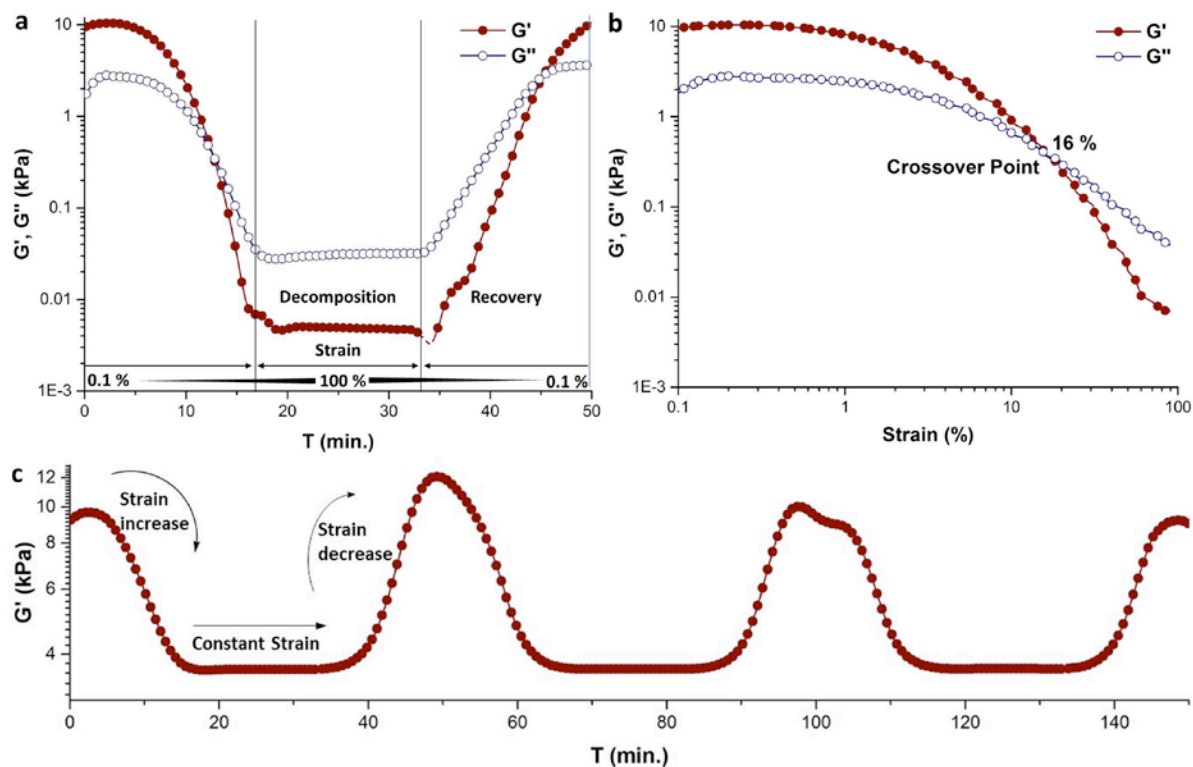

**Figure S24.** Dynamic strain sweep (DSS) measurement on stimuli-responsive G $\supset$ DMSO to confirm its (a) thixotropic behavior, and (b) to determine the maximum strain tolerance limit ( $\omega = 0.1$  Hz). Gel phase recovery in 15 minutes is in agreement with the observed sol to gel transition time lapse (mentioned in the main manuscript i.e. 10-15 minutes) observed for mechanical stimulus (c) strain sweep measurement demonstrating the non-linear viscoelastic response of reversible gel phase for multiple consecutive strain cycles.

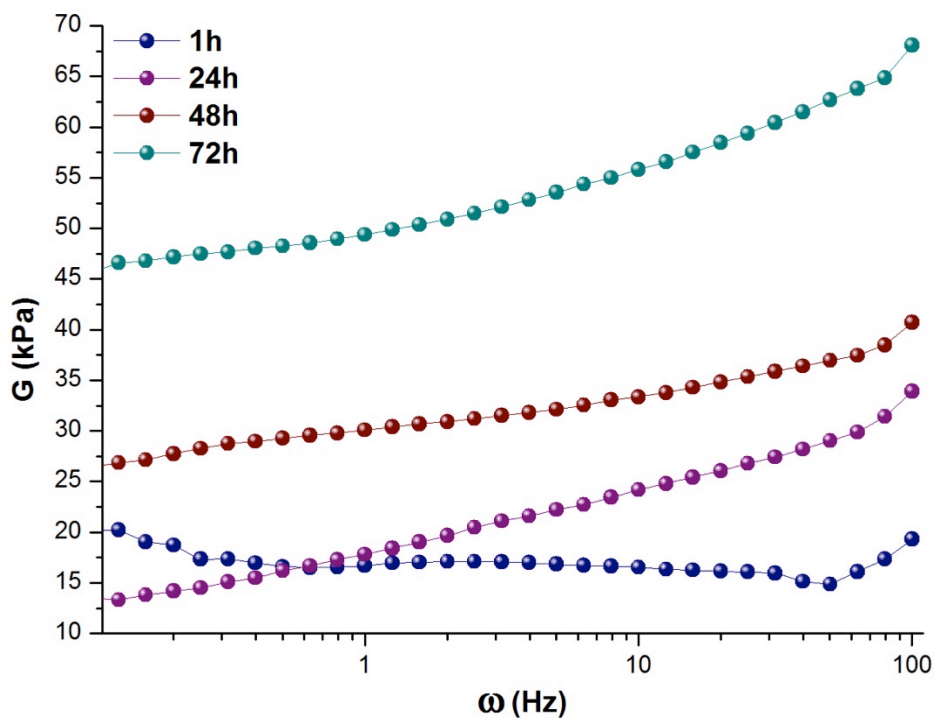

**Figure S25.** Shear modulus ( $G$ ) of  $\text{VE}\Delta\text{ACN}$  measured at different times, obtained from storage and loss moduli at corresponding time points of Fig.4(d),(e) in main manuscript

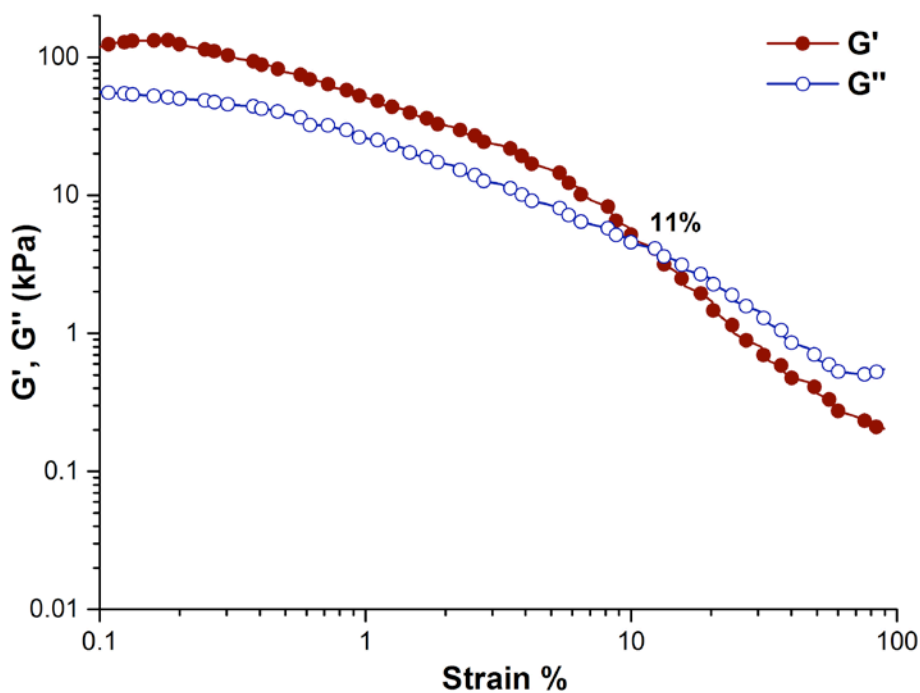

**Figure S26.** Dynamic strain sweep (DSS) measurement on  $\text{VE}\Delta\text{ACN}$  to estimate the maximum strain tolerance of the compound ( $\omega = 0.1$  Hz).

## Viscoelastic behavior – creep and stress relaxation

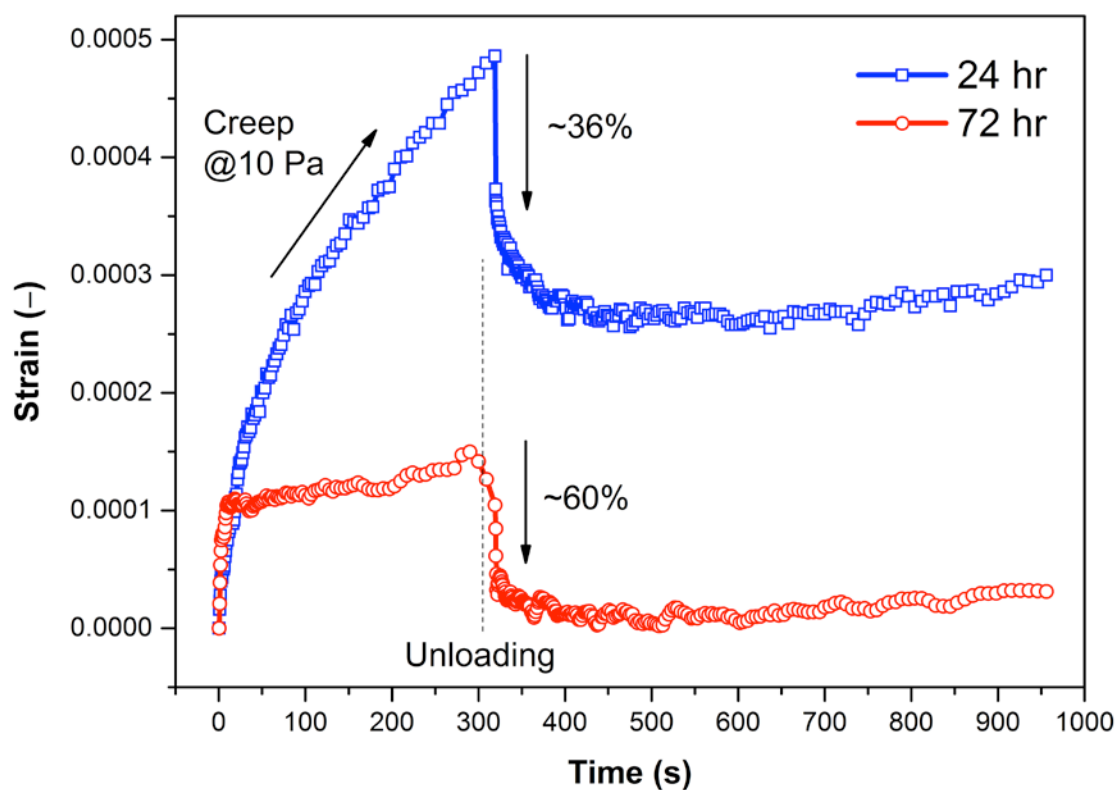

**Figure S27.** Creep-recovery tests at room temperature performed under a constant shear stress  $\tau = 10$  Pa, and followed by complete unloading at 300 sec. The resulting strains as a function of time shows the visco-elastic nature of the  $G \rightarrow VE$  compounds at 24 hr and 72 hr, with respectively experiencing  $\sim 36\%$  and  $\sim 60\%$  in strain recovery (w.r.t. maximum strain prior to unloading). This finding confirms that the transformation of 'weak'  $G$  gel network (suffers from substantial creep) to the  $VE$  semi-solid material confers major improvement in mechanical rigidity.



## Electrical conductivity measurements

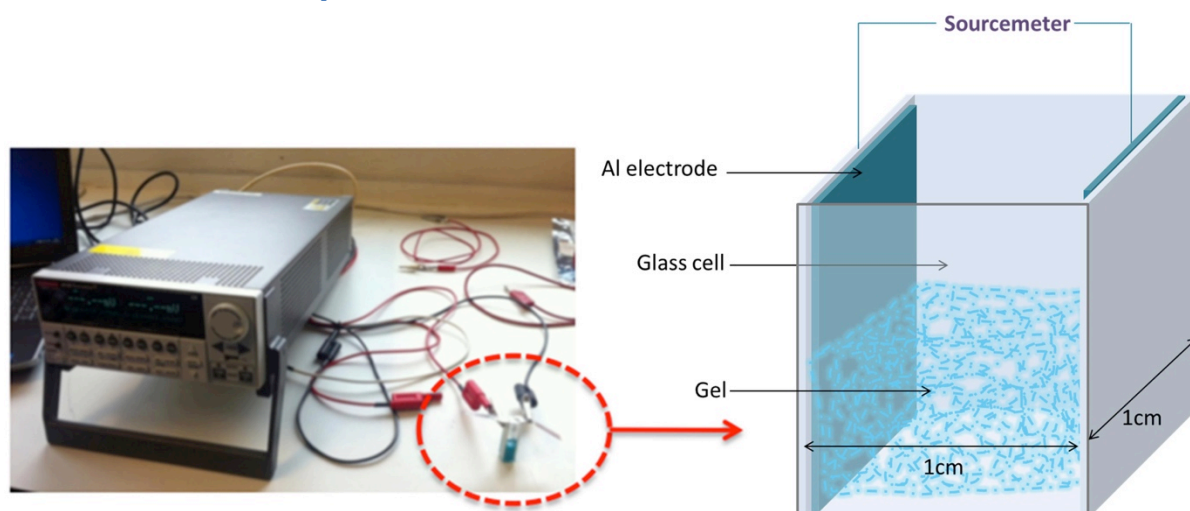

**Figure S28.** Experimental setup and geometry of test cell used in electrical conductivity measurements of gel samples

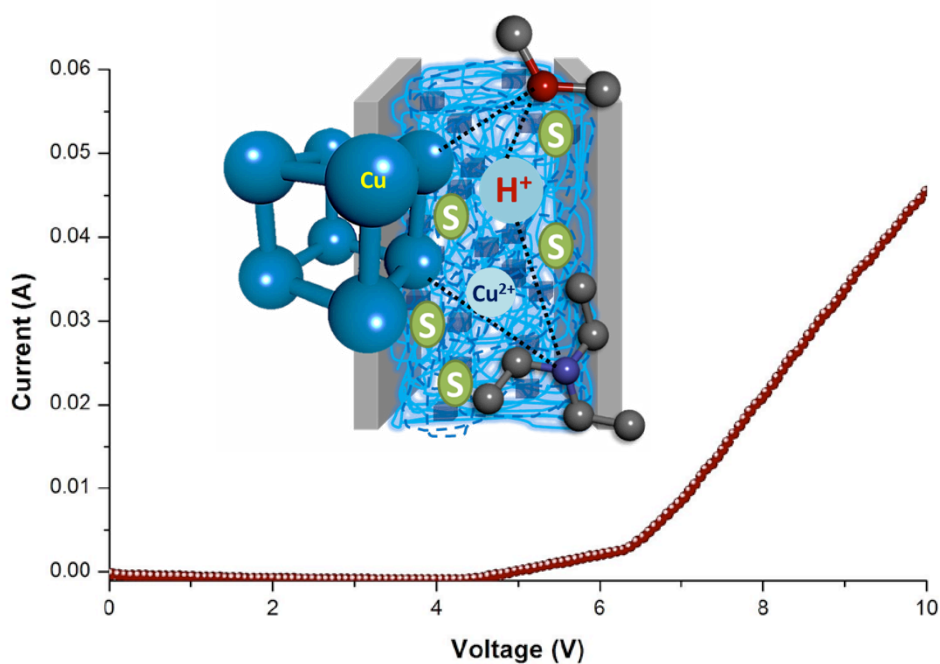

**Figure S29.** Current versus voltage (I-V) curve for the viscoelastic solid  $\text{VE}\Delta\text{ACN}$ . Conductivity measurements were performed by pressing a thin layer of  $\text{VE}\Delta\text{ACN}$  between two aluminum electrodes with dimensions of  $A = 42 \text{ mm}^2$  and  $L = 9 \text{ mm}$ . Inset: illustration depicting potential charge carriers encompassing reactive Cu metal sites in MOF nanoparticles, weakly interacting Cu(II) cations and other ionic species present in fibrous network, in addition to  $\text{H}^+$  ions from occluded solvent.



MOF thin films fabricated from sol-gel method

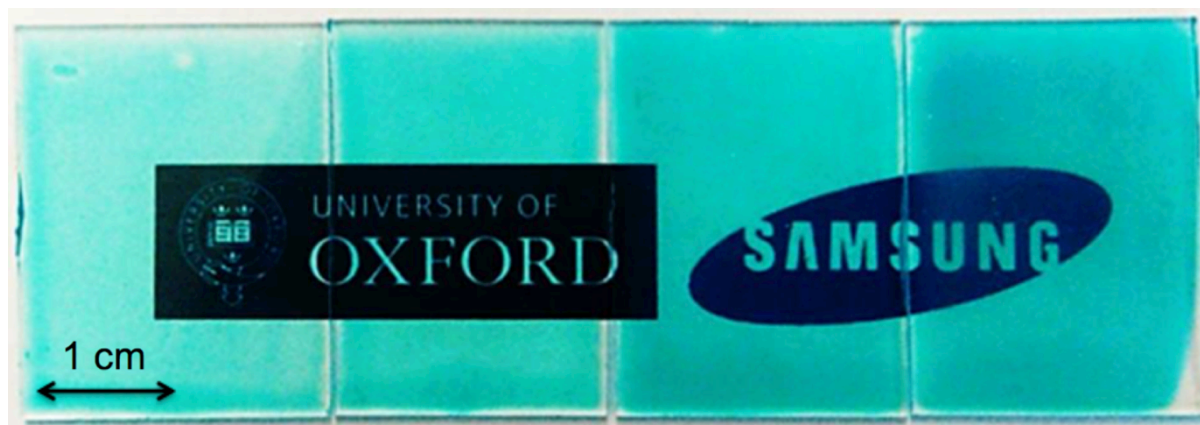

**Figure S30.** MOF thin films with increasing thickness, from left to right *ca.* 1, 2, 5 10  $\mu\text{m}$ , obtained from sol-gel method of **G** $\Rightarrow$ **DMSO** and deposited *via* doctor-blade technique. Film thicknesses were characterized by infinite focus microscopy using a 3D non-contact optical profilometer.

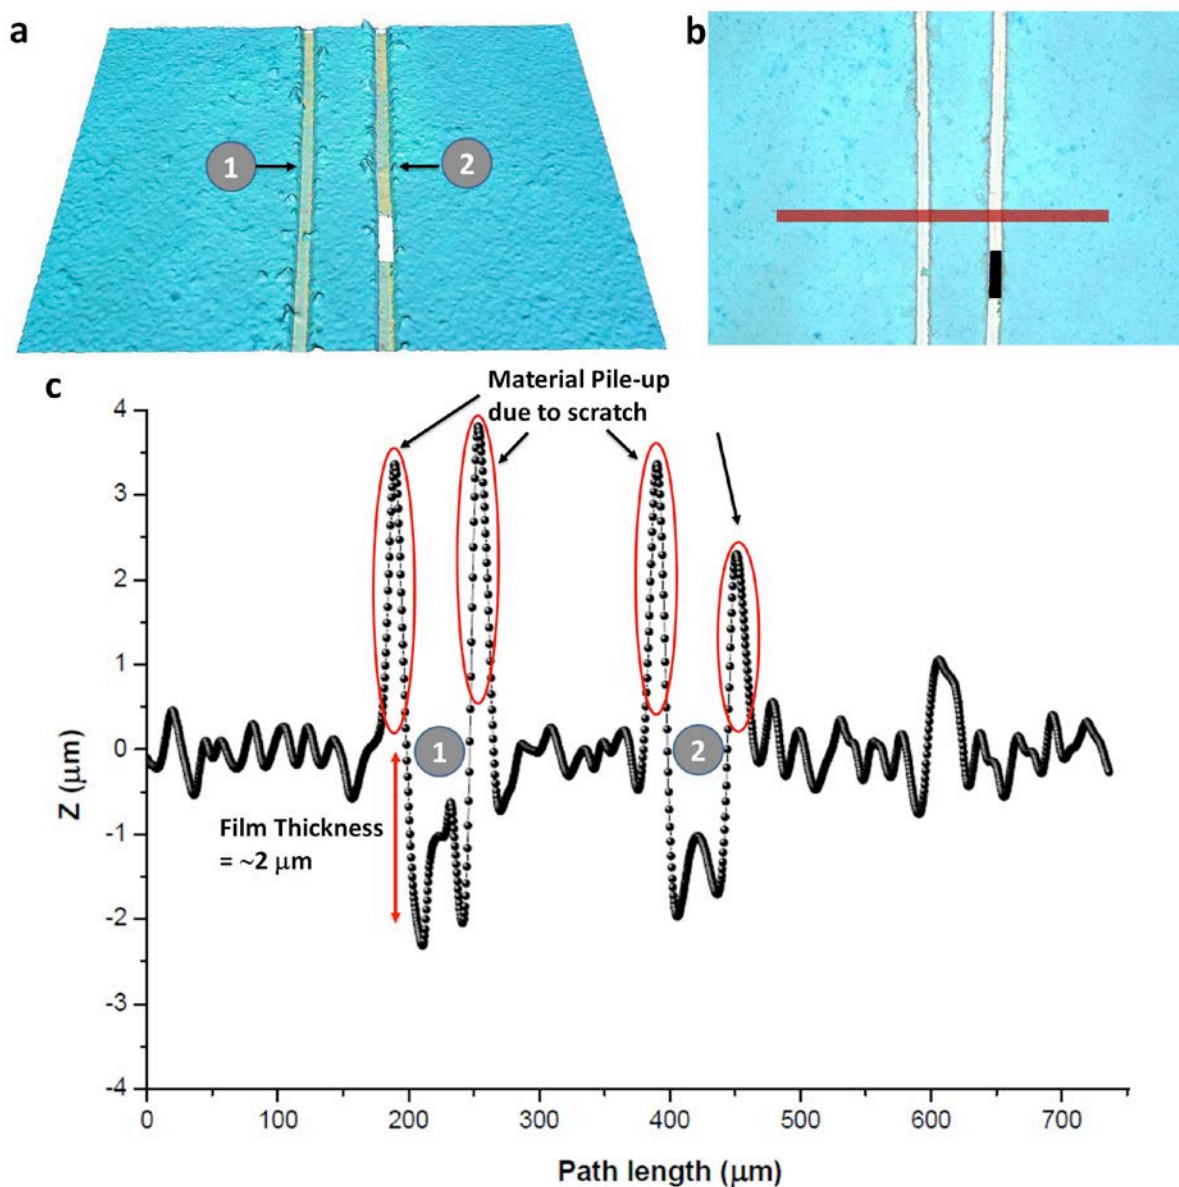

**Figure S31.** Example of thin film thickness measurement method involving optical imaging of the material through the scratches made on film surface: (a) 3D optical colour image determined *via* non-contact profilometer (Infinite Focus Alicona), and (b) 2D image of the sample with two different scratches imaged in a single scan showing (c) film thickness of ~2 μm. Film obtained from the sol of **G**MEH.

## References

- 1 Shoaee, M., Anderson, M. W. & Attfield, M. P. Crystal growth of the nanoporous metal-organic framework HKUST-1 revealed by in situ atomic force microscopy. *Angew Chem Int Ed Engl* **47**, 8525-8528, doi:10.1002/anie.200803460 (2008).
- 2 Jia-Min Chen, J.-J. S., Wei-Wei Huang, Yan-Ni Lao, Shi-Ping Yang. Triethylaminium-trimesate-trimesic acid-water (1/1/1/2). *Acta Crystallographica Section E: Structure Reports* **63**, o3053 (2007).
- 3 Davey, R. J., Brychczynska, M., Sadiq, G., Dent, G. & Pritchard, R. G. Crystallising trimesic acid from DMSO solutions - can crystallography teach us anything about the process of crystal nucleation? *Crystengcomm* **15**, 856-859, doi:10.1039/c2ce26712h (2013).
